# Supplementary material
Source: ML conference proceedings conference paper supplement (https://proceedings.mlr.press/v84/gao18a.html)
Supplement: Supplementary file [file gao18a-supp.pdf]

## Supplementary Material

### 1 Proofs in Section 2

Before we prove Proposition 1, let us recall the definition of star-convexity and show a lemma.

**Definition 1** (*Star-convex functions*). A function  $f : \mathbf{R}^n \rightarrow \mathbf{R}$  is star-convex if there is  $x^* \in \operatorname{argmin}_{x \in \mathcal{X}} f(x)$  such that for all  $\alpha \in [0, 1]$  and  $x \in \mathcal{X}$ ,

$$f((1 - \alpha)x^* + \alpha x) \leq (1 - \alpha)f(x^*) + \alpha f(x). \quad (1)$$

The following lemma characterizes the differentiable star-convex functions.

**Lemma 1** For a differentiable function  $f$ , the star convexity condition (1) is equivalent to the following condition

$$f(x) - f(x^*) \leq \nabla f(x)^\top (x - x^*), \quad (2)$$

where  $x^* = \operatorname{argmin}_{x \in \mathcal{X}} f(x)$ .

*Proof.* Suppose (1) holds. Then we have

$$f(x) - f(x^*) \leq \frac{f(x) - f((1 - \alpha)x^* + \alpha x)}{1 - \alpha}, \quad (3)$$

for all  $\alpha \in [0, 1]$ . Note that

$$\lim_{\alpha \rightarrow 1^-} \frac{f(x) - f((1 - \alpha)x^* + \alpha x)}{1 - \alpha} = \nabla f(x)^\top (x - x^*),$$

which implies (2). Conversely, suppose that (2) holds. Let us denote

$$d(\alpha) := f((1 - \alpha)x^* + \alpha x) - f(x^*).$$

Clearly, (1) is equivalent to

$$d(\alpha) \leq \alpha d(1), \text{ for all } 0 \leq \alpha \leq 1. \quad (4)$$

It remains to show that if  $f$  is differentiable then (2) implies (4). In fact, (2) leads to

$$f((1 - \alpha)x^* + \alpha x) - f(x^*) \leq \alpha \nabla f((1 - \alpha)x^* + \alpha x)^\top (x - x^*),$$

or,

$$d(\alpha) \leq \alpha d'(\alpha).$$

Hence,

$$\left( \frac{d(\alpha)}{\alpha} \right)' = \frac{\alpha d'(\alpha) - d(\alpha)}{\alpha^2} \geq 0,$$

for all  $0 < \alpha \leq 1$ , implying that  $\frac{d(\alpha)}{\alpha}$  is a nondecreasing function for  $\alpha \in (0, 1]$ . Therefore,

$$\frac{d(\alpha)}{\alpha} \leq \frac{d(1)}{1},$$

which proves (4) for  $\alpha \in (0, 1]$ . Since  $d(0) = f(x^*) - f(x^*) = 0$ , (4) in fact holds for all  $\alpha \in [0, 1]$ .  $\square$

**Proposition 1** If  $f(\cdot)$  is star-convex and smooth with bounded gradient in  $\mathcal{X}$ , then  $f(\cdot)$  is weakly pseudo-convex.

**Proof:** From Lemma 1, we have

$$\begin{aligned} f(x) - f(x^*) &\leq \nabla f(x)^\top \|x - x^*\| \\ &\leq M \frac{\nabla f(x)^\top (x - x^*)}{\|\nabla f(x)\|} \end{aligned}$$

where the last inequality is due to the bounded gradient condition  $\|\nabla f(x)\| \leq M$  for  $x \in \mathcal{X}$ .  $\square$

**Proposition 2** If  $f(\cdot)$  has bounded gradient and satisfies the acute angle condition, then  $f(\cdot)$  is weakly pseudo-convex.

**Proof:** For all  $x \in \mathcal{X}$ , we have

$$\begin{aligned} f(x) - f(x^*) &\leq M \|x - x^*\| \\ &\leq \frac{M \nabla f(x)^\top (x - x^*)}{Z \|\nabla f(x)\|} \end{aligned}$$

where the first inequality follows from the bounded gradient assumption while the second inequality is due to the acute angle condition.  $\square$

**Proposition 3** If  $f(\cdot)$  has bounded gradient and satisfy the  $\alpha$ -homogeneity with respect to its minimum, i.e., there exists  $\alpha > 0$  satisfying

$$f(t(x - x^*) + x^*) - f(x^*) = t^\alpha (f(x) - f(x^*)),$$

for all  $x \in \mathcal{X}$  and  $t \geq 0$  where  $x^* = \operatorname{argmin}_{x \in \mathcal{X}} f(x)$ , then  $f(\cdot)$  is weak pseudo-convex.

**Proof:** By taking the derivative of the equation (3) with respect to  $t$  and letting  $t = 1$ , we have

$$\nabla f(x)^\top (x - x^*) = \alpha (f(x) - f(x^*)).$$

Therefore, we have

$$\begin{aligned} f(x) - f(x^*) &= \frac{1}{\alpha} \nabla f(x)^\top (x - x^*) \\ &\leq \frac{M}{\alpha} \frac{\nabla f(x)^\top (x - x^*)}{\|\nabla f(x)\|}, \end{aligned}$$

which satisfies the weak pseudo-convexity condition with  $K = \frac{M}{\alpha}$ .  $\square$
